# Supplementary material for: A copper-containing analog of the biomineral whitlockite: dissolution–precipitation synthesis, structural and biological properties
Source: Royal Society of Chemistry journal article supplement (doi:10.1039/d3dt03756h), 2023-12-13
Supplement: d3dt03756h1.pdf [file d3dt03756h1.pdf]

# Copper-Containing Analog of the Biomineral Whitlockite: Dissolution-Precipitation Synthesis, Structural and Biological Properties

Diana Griesiute<sup>1</sup>, Agne Kizalaite<sup>1</sup>, Arita Dubnika<sup>2,3</sup>, Vytautas Klimavicius<sup>4</sup>, Vidmantas Kalendra<sup>5</sup>,  
Vaclav Tyrpek<sup>6</sup>, Sung Hun Cho<sup>7</sup>, Tomoyo Goto<sup>7,8</sup>, Tohru Sekino<sup>7</sup>, Aleksej Zarkov<sup>1,\*</sup>

<sup>1</sup>*Institute of Chemistry, Vilnius University, Naugarduko 24, LT-03225 Vilnius, Lithuania*

<sup>2</sup>*Rudolfs Cimdins Riga Biomaterials Innovations and Development Centre of RTU, Faculty of  
Materials Science and Applied Chemistry, Institute of General Chemical Engineering, Riga  
Technical University, LV-1007 Riga, Latvia*

<sup>3</sup>*Baltic Biomaterials Centre of Excellence, Headquarters at Riga Technical University, LV-1658  
Riga, Latvia*

<sup>4</sup>*Institute of Chemical Physics, Vilnius University, Sauletekio 3, LT-10257 Vilnius, Lithuania*

<sup>5</sup>*Institute of Applied Electrodynamics and Telecommunications, Vilnius University, Sauletekio 3,  
LT-10257 Vilnius, Lithuania*

<sup>6</sup>*Department of Inorganic Chemistry, Faculty of Science, Charles University, Hlavova 2030/8, 128  
43 Prague, Czech Republic*

<sup>7</sup>*SANKEN (The Institute of Scientific and Industrial Research), Osaka University, 8-1 Mihogaoka,  
Ibaraki, Osaka 567-0047, Japan*

<sup>8</sup>*Institute for Advanced Co-Creation Studies, Osaka University, 1-1 Yamadaoka, Suita, Osaka 565-  
0871, Japan*

\*Author to whom correspondence should be addressed. E-mail: [aleksej.zarkov@chf.vu.lt](mailto:aleksej.zarkov@chf.vu.lt)

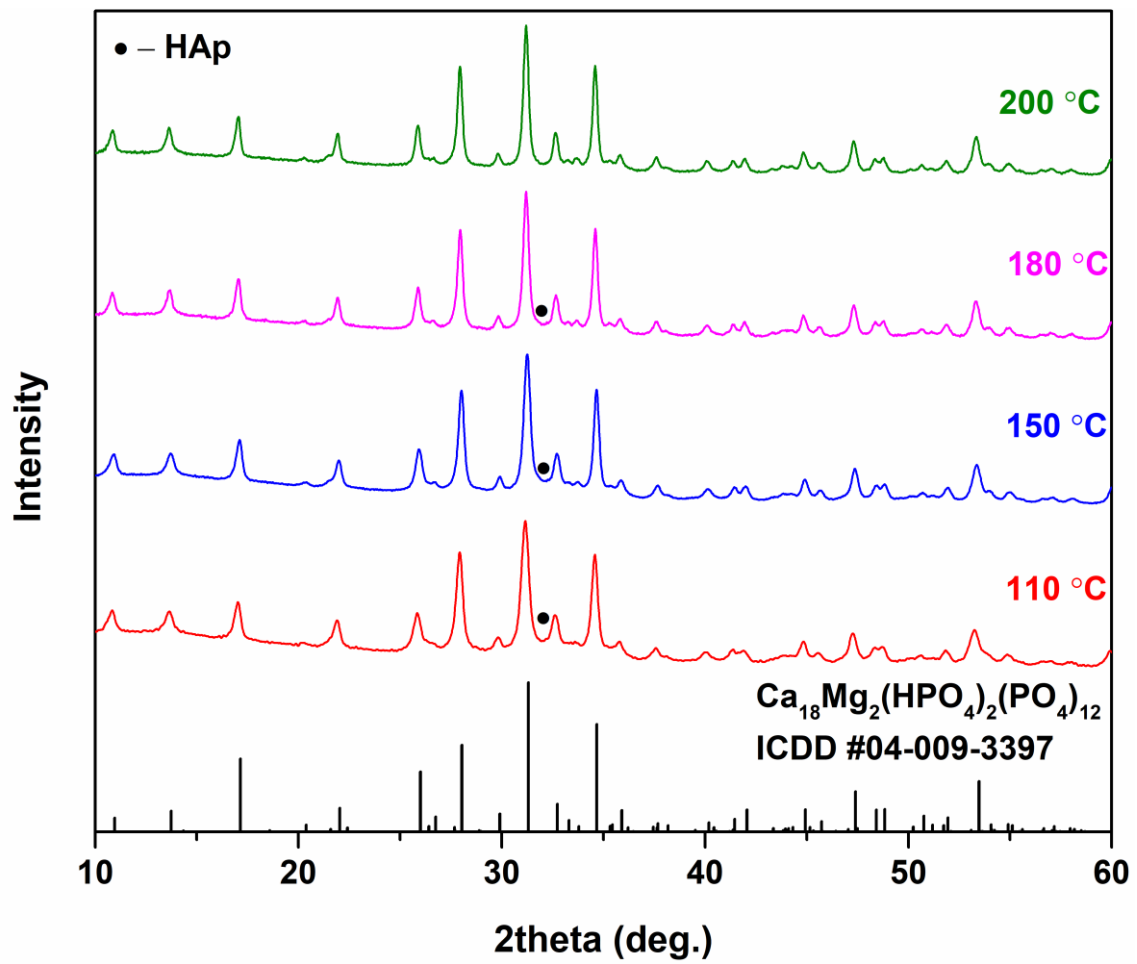

**Fig. S1.** XRD patterns of Cu-WH powders synthesized at different temperatures (pH = 6.4, t = 3h, Ca/Cu = 9).

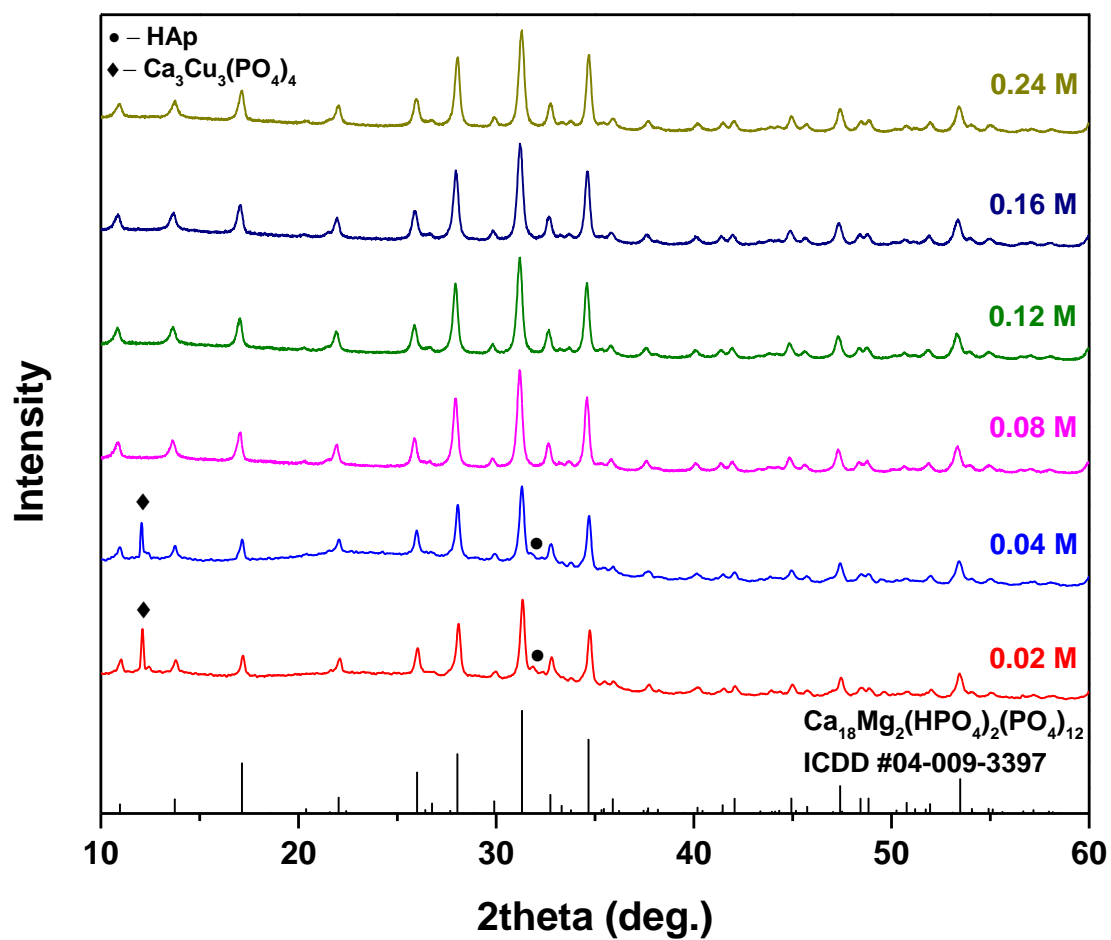

**Fig. S2.** XRD patterns of Cu-WH powders synthesized with different concentrations of precursors. Standard concentration is 0.08 M (pH = 6.4, T = 200 °C, t = 3 h, Ca/Cu = 9). The increased background in the XRD patterns of 0.02 M and 0.04 M samples arises from the glass sample holder.
